# Supplementary material for: Evaluation of Nurses' Knowledge and Competency in Sepsis Management: “A Case Study of Adult ICU/HDU Setting at Chuk.”
Source: Research Square preprint supplement (doi:10.21203/rs.3.rs-6823593/v1), 2025-06-30

**INFORMED CONSENT AND CONSENT FORM**

This Informed Consent Form has two parts: Information Sheet (to share information about the research with you) and Certificate of Consent (for signatures if you agree to take part).

A participant will receive a copy of the full Informed Consent Form

**INFORMATION SHEET**

**Introduction**

**TOPIC: Evaluation of Nurses' Knowledge and competence management regarding sepsis among Critical Patients in ICU/HDU at CHUK- Kigali Rwanda.**

Kind regards, MUKANTWARI Sophie, INGABIRE Faustine and MANIRAGENA Aline are our names. We are the members staff in ICU/HDU at Kigali University Teaching Hospital. We must do a clinical operational research as requirement each year.

We would like to invite you to take part in this study, which is titled **Evaluation of Nurses' Knowledge and competence management of sepsis among Critical Patients in ICU/HDU at CHUK.**

The goal of the study is to evaluate nurses’ knowledge and competency management regarding sepsis.

**Participation:**  It is optional to take part in this study. Participants are allowed to decline and withdraw from the study at any time they choose. A consent form will be signed by those who are willing to participate as their agreement to do so. However, there will never be any instant advantages from this. Participants are advised to ask questions if they do not understand something.

**Procedure:** A structured questionnaire will contain a collection of questions for the investigation. Participants will receive a self-administered survey to complete following the completion of the consent form.

**Risks and discomfort**: Despite the fact that some of the participants' time is used to answer some questions, there are no risks associated with this study. Participants that require additional discussion will be given it in order to better comprehend the subject.

**Benefits**: Participation in this study is not financially rewarding because it is a clinical operational research in nature, but the data will assist policymakers make decisions that will assure the advancement of critical care nurses' knowledge and competence management regarding sepsis.

**Confidentiality**: To the degree authorized by law, participant research records and any other information will be treated in confidence. Participants will be given numbers, and personal data won't be disclosed without their express consent unless required by law.

**Dissemination of results**: After the study is published, the CHUK administration will receive the study results, which will then be made available to the research community as required.

**Contact details**

If you have any questions regarding this research now or later, you may contact us on the following contacts:

**Researchers:**

MUKANTWARI Sophie Tel: +250788515369, E-mail: mukantwalisophie@gmail.com.

INGABIRE Faustine +250787441843 E-mail:ngabirosfau@gmail.com.

MANIRAGENA Aline +250783283309: E-mail:maniragenaaline6@gmail.com.

You can get in touch with the research office, you can reach out to the Chairperson of the ethics committee at CHUK by calling +250785466254.

**INFORMED CONSENT FORM**

**Part II: Certificate of consent**

I certify that I have read or been educated about the study Evaluation **Nurses' Knowledge and competency management of sepsis among Critical Patients in ICU/HDU at Kigali Teaching Hospital-Rwanda.** I was given the opportunity to ask questions, and my inquiries were well-resolved. I am aware that my participation in the study is optional and that I can end it at any moment without giving a reason. I accept to participate in the study on nurses' knowledge and competency management of sepsis in ICU/HDU at CHUK.

Participant’s name: ……………………….……………………Date of signature:/…. /2024

Researcher’s name: ………………………………………….... Date of signature:./……/2024

**ENGLISH VERSION QUESTIONNAIRE**

**Instrument Development and Validation**

Informed by the prior work of Nakiganda et al. and Manika et al., the questionnaire was initially pretested among nurses in the Pediatric Intensive Care Unit (PICU) to ensure its alignment with the study's objectives. Feedback from this phase guided revisions to improve clarity, relevance, and contextual accuracy. The refined tool was then evaluated by a panel of experts, including seasoned critical care nurses and a senior ICU physician with extensive experience in sepsis management. The final version achieved a Content Validity Index (CVI) of 0.86, indicating strong content validity and suitability for the study(8,9).

**SECTION 1: DEMOGRAPHIC INFORMATION**

**1.Gender:**

a.Male ☐

b.Female ☐

**2.Age:**

a.20-29 ☐

b.30-39 ☐

c.40-49 ☐

d.50 and above

**3.Marital status:**

a. Single☐

b.Married☐

c.widow☐

d.Divorced☐

**4.Highest Level of Education:**

a.Diploma in Nursing ☐

b.Bachelor’s Degree in Nursing ☐

c.Master’s Degree in Nursing ☐

**5.Years of Experience in ICU/HDU:**

a.Less than 1 year ☐

b.1-3 years ☐

c.4-6 years ☐

d.7 years and above ☐

**6.Have you received any specific training in sepsis management?**

a.Yes ☐

b.No ☐

**SECTION 2: KNOWLEDGE ASSESSMENT OF SEPSIS**(‘Tool 1.pdf’, no date)

**Please select the most appropriate answer for each question.**

**1.What is sepsis?**

a.A severe allergic reaction☐

b.A systemic inflammatory response to infection☐

c.A type of cancer☐

**2.Which microorganisms are most commonly responsible for sepsis?**

a.Bacteria ☐

b.Viruses ☐

c.Fungi ☐

d.All of the above ☐

**3. How do underlying conditions such as diabetes, immunosuppression, aseptic wounds, and chronic kidney disease contribute to the development of sepsis in ICU settings?**

a) They increase susceptibility to infections☐

b) They cause direct tissue damage☐

c) They decrease the effectiveness of antibiotics☐

d) They delay the recognition of sepsis☐

**4.According to the Surviving Sepsis Campaign guidelines, what is the recommended time frame for administering antibiotics after sepsis is suspected?**

a.Within 1 hour ☐

b.Within 3 hours ☐

c.Within 6 hours ☐

d.When the physician confirms sepsis ☐

**5. What role do invasive devices play in increasing the risk of sepsis in critically ill patients?**

a) They introduce microorganisms directly into the bloodstream☐

b) They improve the body's immune response☐

c) They prevent bacterial growth☐

d) They enhance tissue healing☐

**6.What is the initial fluid resuscitation recommendation for a patient with septic shock**

a.500ml of normal saline

b.1-2 liters of crystalloids within the first hour

c.No fluids are needed if blood pressure ii stable

**7. Which of the following is a common sign of sepsis? (Select all that apply)**

a.Fever or hypothermia

b.Rapid heart rate

c.Low blood pressure

d.Increased urine output

**SECTION 3: COMPETENCY IN SEPSIS MANAGEMENT**

**1.How often do you assess the risk of sepsis in ICU/HDU patients?**

a.Every shift ☐

b.Daily ☐

c.Weekly ☐

d.Only when sepsis is suspected ☐

**2.Which of the following is the best first-line treatment for sepsis?**

a.Intravenous antibiotics ☐

b.Oral antibiotics ☐

c.Antiviral medications ☐

d.Fluid restriction ☐

**3.What laboratory tests are essential for diagnosing sepsis? (select all that apply)**

a.Blood cultures☐

b,Complete blood count☐

c.Liver function tests☐

d.Urinalysis☐

**4.How familiar are you with the Sepsis Six care bundle (oxygen therapy, blood cultures, antibiotics, fluids, lactate, urine output)?**

a.Very familiar ☐

b.Not familiar ☐

**5.How do hospital-acquired infections, such as ventilator-associated pneumonia or catheter-associated bloodstream infections, contribute to the development of sepsis in ICU settings?**

a) They introduce resistant microorganisms that are difficult to treat☐

b) They reduce the need for infection control measures☐

c) They are rarely associated with sepsis☐

d) They enhance the effectiveness of antibiotics☐

**6.** **How do early identification and timely intervention impact the prognosis of sepsis in ICU patients?**

a) They significantly reduce mortality rates☐

b) They delay the progression of organ failure☐

c) They have no impact on the outcome☐

d) They only reduce the need for antibiotics☐

**7.What are the key factors that contribute to the rapid progression of sepsis in ICU patients?**

a) Delayed diagnosis and treatment☐

b) Lack of invasive monitoring☐

c) Increased physical activity☐

d) Overuse of prophylactic antibiotics☐

**8. What resources do you utilize for information on sepsis management? (Select all that apply)**

a.Clinical guidelines☐

b.Online courses☐

c.Workshops/conferences☐

d.Peer discussions☐

**9. How do organ dysfunction and sepsis-induced immunosuppression interact in critically ill ICU patients?**

a) Organ dysfunction worsens sepsis-induced immunosuppression☐

b) Organ dysfunction reduces the severity of sepsis☐

c) Immunosuppression helps protect organs from damage☐

d) They have no significant interaction☐

**10. Have you participated in any training or educational programs focused on sepsis management in the past year?**

Yes☐

No☐

**Thank you for your collaboration and contribution in this research.**

**APPROVAL FROM CHUK ETHICS COMMITTEE.**


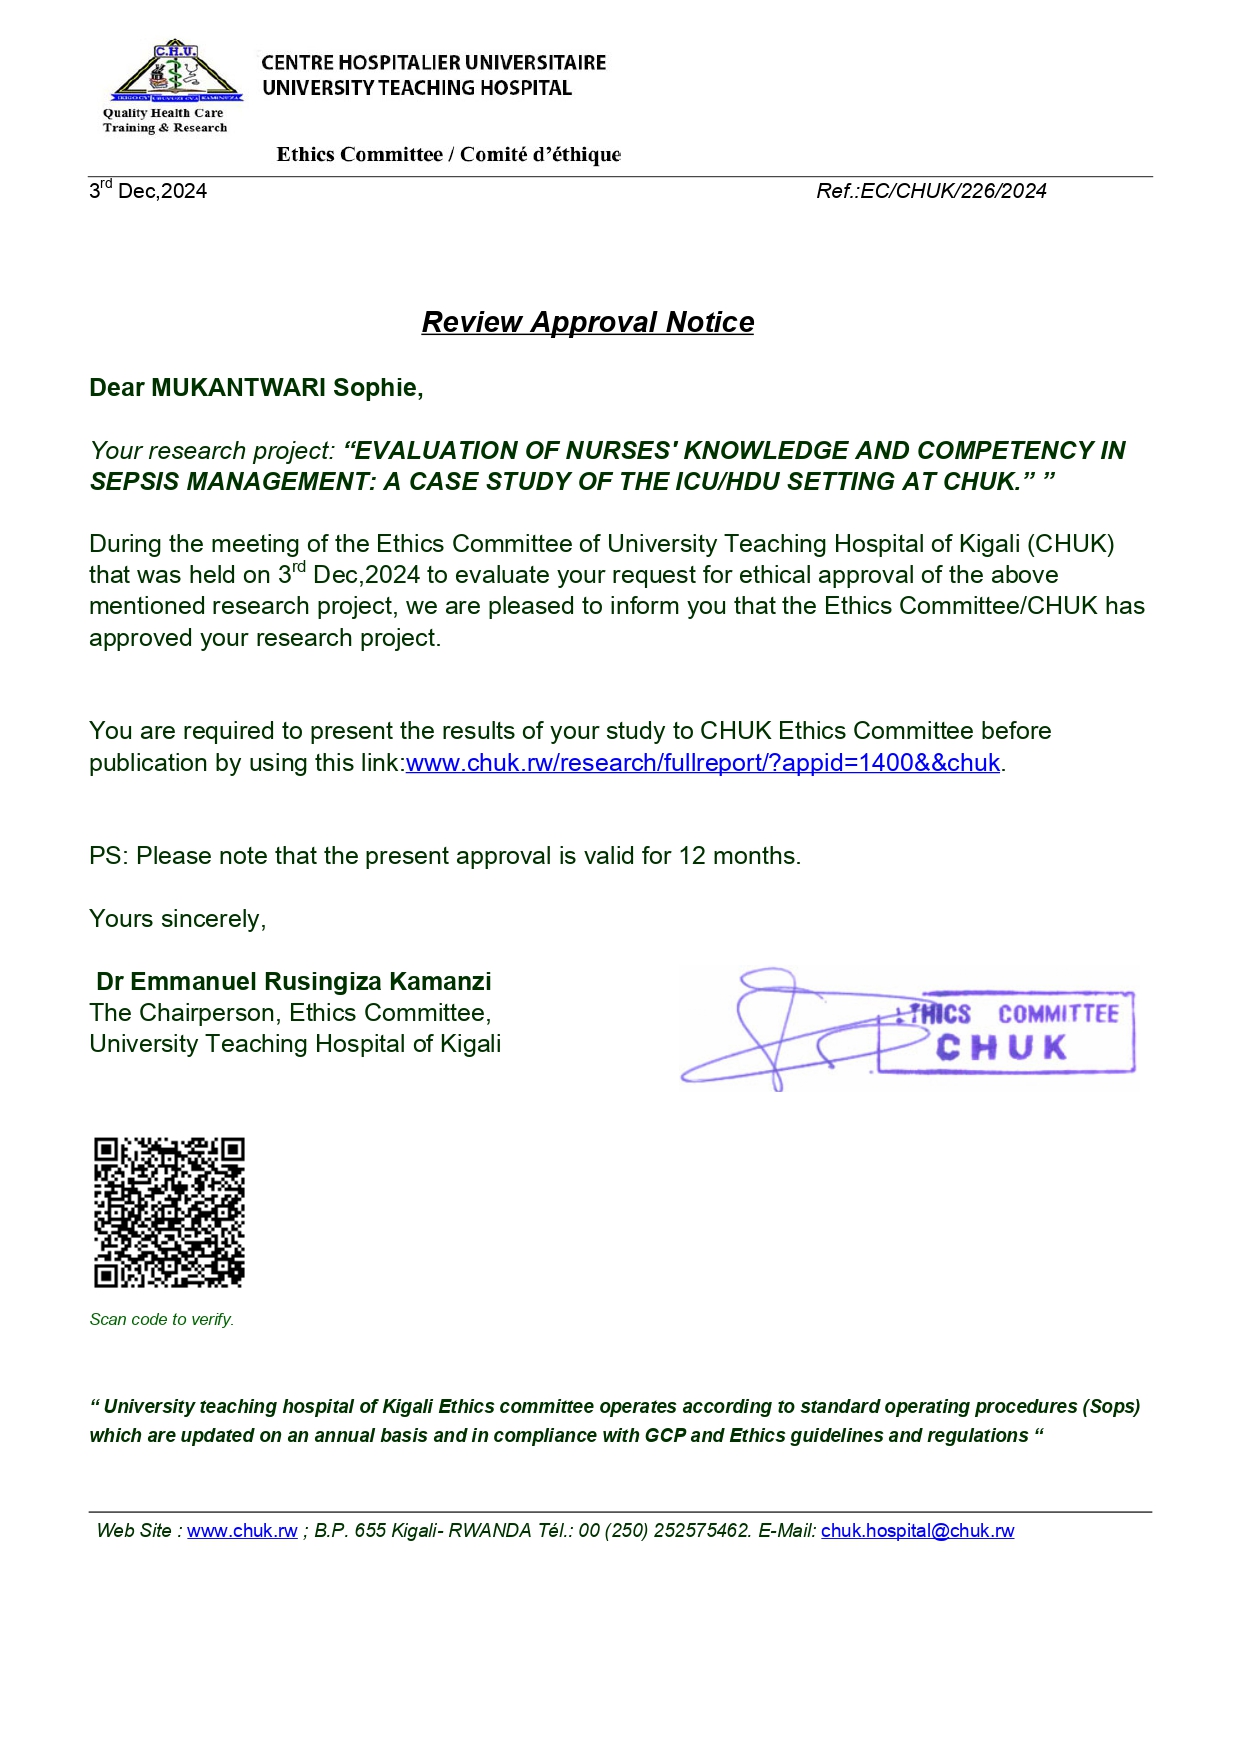

Supplement: Supplementary file 1 [file 114b0845cccaf7c759a50bbb.docx]
